# Supplementary material for: Procarbazine, CCNU and vincristine (PCV) versus temozolomide chemotherapy for patients with low-grade glioma: a systematic review
Source: PubMed Central journal article supplement (PMC6154749; doi:10.18632/oncotarget.25890), 2018-09-14
Supplement: oncotarget-09-33623-s001.pdf [file oncotarget-09-33623-s001.pdf]

# Procarbazine, CCNU and vincristine (PCV) versus temozolomide chemotherapy for patients with low-grade glioma: a systematic review

## SUPPLEMENTARY MATERIALS

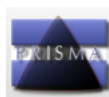

**PRISMA Flow Diagram**

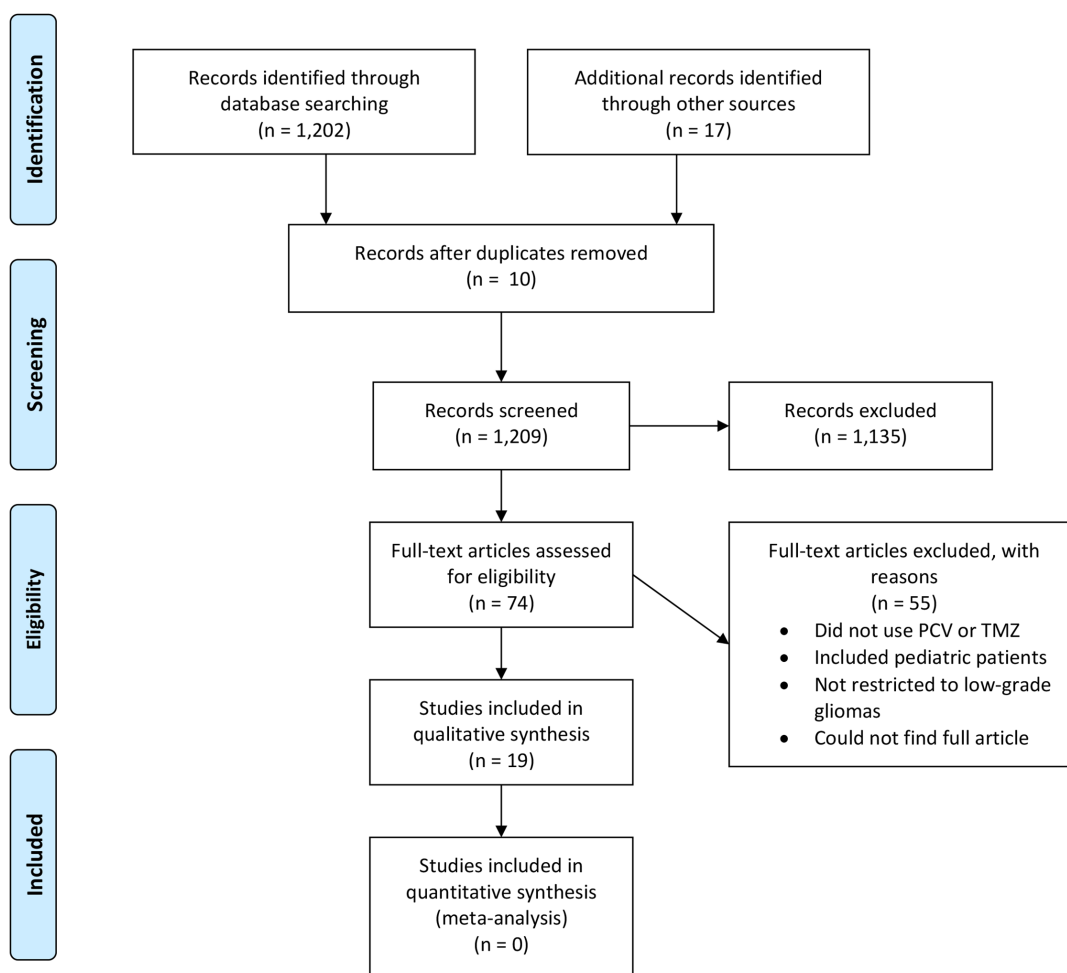

From: Moher D, Liberati A, Tetzlaff J, Altman DG, The PRISMA Group (2009). Preferred Reporting Items for Systematic Reviews and Meta-Analyses: The PRISMA Statement. PLoS Med 6(6): e1000097. doi:10.1371/journal.pmed1000097

For more information, visit [www.prisma-statement.org](http://www.prisma-statement.org).

**Supplementary Figure 1: PRISMA flow diagram of literature review process.** Flow diagram detailing the literature review process, including initial screening, reasons for excluded papers, and final papers meeting inclusion criteria.

**Supplementary Figure 2: PRISMA checklist.** Checklist describing sections of manuscript that abide by PRISMA requirements.

See Supplementary Figure 2
